**The role of the pericardium in the valveless, tubular heart of  
the tunicate, *Ciona savignyi***

Lindsay D. Waldrop<sup>1,\*</sup> and Laura A. Miller<sup>1,2</sup>

<sup>1</sup>Dept. of Mathematics, CB # 3250, Univ. of North Carolina,  
Chapel Hill, NC 27599

<sup>2</sup>Dept. of Biology, CB #3280, Univ. of North Carolina, Chapel  
Hill, NC 27599

\*Author of Correspondence: [lwaldrop@email.unc.edu](mailto:lwaldrop@email.unc.edu)

July 1, 2015

## Summary

Tunicates, small invertebrates within the phylum Chordata, possess a robust tubular heart which pumps blood through their open circulatory systems without the use of valves. This heart consists of two major components: the tubular myocardium, a flexible layer of myocardial cells which actively contracts to drive fluid down the length of the tube; and a pericardium, a stiff, outer layer of cells that surrounds the myocardium and creates a fluid-filled space between the myocardium and the pericardium. We investigate the role of the pericardium through *in vivo* manipulations on tunicate hearts and computational simulations of the myocardium and pericardium using the immersed boundary method. Experimental manipulations reveal that damage to the pericardium results in aneurysm-like bulging of the myocardium and major reductions in the net blood flow and percent closure of the heart's lumen during contraction. In addition, varying the pericardium-to-myocardium (*PM*) diameter ratio by increasing damage severity was positively correlated with peak dye flow in the heart. Computational simulations mirror the results of varying the *PM* ratio experimentally. Reducing the stiffness of the myocardium in the simulations reduced mean blood flow only for simulations without a pericardium. These results indicate that the pericardium has the ability to functionally increase the stiffness of the myocardium and limit myocardial aneurysms. The pericardium's function is likely to enhance flow through the highly resistive circulatory system by acting as a support structure in the absence of connective tissue within the myocardium.

**Keywords:** *Ciona*, fluid dynamics, pericardium, valveless heart, tunicate

## Introduction

Many animals contract flexible, muscular tubes to drive viscous fluid through smaller, resistive tubes, including hearts in several phyla (Xavier-Neto et al., 2007, 2010), drinking butterflies and moths (Krenn, 2010), lymphatic pumps (Gashev, 2002), and tracheal systems in terrestrial insects (Greenlee et al., 2013; Harrison et al., 2013). These pumps are versatile and widespread, operating over several orders of magnitude of sizes and flow velocities and occurring commonly and independently throughout bilaterians (Xavier-Neto et al., 2007).

Despite being both common and widespread, the dynamics of driving fluid with a flexible boundary that deforms as a result of viscous resistance are not well understood. In typical mathematical models of pumping, the motion of the pump is prescribed and the resulting fluid flow is determined analytically or numerically. Furthermore, accessory structures to these pumps, such as trabeculae, blood cells, and external tissues, are often ignored. In this study, we will focus on the interaction between the flexible, contractile boundary responsible for driving fluid flow and an accessory structure, the pericardium, through animal experiments and a computational model.

Tunicates (urochordates) are small marine invertebrates belonging to the phylum Chordata (Fig. 1A). Recently, tunicates have been investigated as a model system for vertebrate embryonic heart development because: they represent vertebrates' closest invertebrate relatives and as a possible sister taxon of Vertebrata (Delsuc et al., 2006; Davidson, 2007; Lemaire, 2011); they demonstrate a deep phylogeny in the genetic mechanisms of heart development (Nunzi et al., 1979; Burighel et al., 2001; Xavier-Neto et al., 2010); and fluid flow in their circulatory system is driven by a valveless, tubular heart that resembles

the size, morphology, and kinematics of the hearts of developing vertebrate embryos (Rupert and Carle, 1983; Dooley and Zon, 2000; Manner et al., 2010; Lemaire, 2011). Thus, understanding the flow produced by valveless, tubular hearts of tunicates is key to understanding both the ontogenetic and evolutionary development of closed, high-pressure circulatory systems of vertebrates (Santhanakrishnan and Miller, 2011; McMahon, 2012; McMahon et al., 2011; Dooley and Zon, 2000; Moorman and Christoffels, 2003; Xavier-Neto et al., 2007, 2010; Simoes-Costa et al., 2005).

The circulatory system of most tunicates is characterized as open, with major vessels that lead away from the heart and open into sinuses to deliver blood to body tissues. Unusually robust for a sessile, suspension-feeding animal (Xavier-Neto et al., 2010), the tubular heart drives fluid flow through these resistive tissues of the body and reverses flow periodically to even the transport of oxygen, nutrients, and waste throughout its circulatory system (Heron, 1975).

The tunicate heart (Fig. 1B) consists of a layer of myocardial tissue formed by an invagination of the outer, stiff pericardium, each one cell-layer thick (Kalk, 1970). The myocardium and pericardium are connected at the raphe on the basement membrane of pericardium where the invaginated tube has fused together and runs along the ventral surface of the pericardium (Xavier-Neto et al., 2010). The myocardium consists of a field myoepithelial contractile cells, which are much longer than they are wide, and a 1-2  $\mu\text{m}$  thick basal membrane that lines the lumen (Kalk, 1970). The fusiform cells do not form fibers, but the myofibrils run along the cells' lengths and are at a diagonal in relation to the basement membrane of the pericardium (Kalk, 1970). The pericardium is innervated early in development from the right subendostylar nerves and latero-posterior mantle nerves through the raphe, which possibly have a

role in sensing pressure within the cardiac lumen (Nunzi et al., 1979; Burighel et al., 2001).

The myocardium contracts to reduce the radius of the heart's lumen. This contraction propagates down the length of the heart tube to drive blood flow through the circulatory system. These contraction waves are produced by nodes on either end of contractile region of the heart tube (Anderson, 1968; Heron, 1975). The pericardium consists of an outer layer of cells, which are stiff and resistant to manipulation. Cells of the pericardial tissue are square and junctions between cells provide mechanical support, although no additional specialized connective tissue exists in the myocardium or pericardium (Kalk, 1970).

For many vertebrates, the pericardium is an important structure. It serves to support the heart in the thoracic cavities of mammals, to limit ventricular fill, and to prevent rotation during ventricular contraction that is associated with higher mortality (Fritz et al., 2012). In elasmobranch and teleost fish, the pericardium supports sub-ambient pressures in the pericardial cavity that surrounds the atrium and ventricle, which aids in filling the ventricles *vis a fronte* (Sudak, 1965b,a; Shabetai et al., 1979; Farrell et al., 1988). Recently, fluid motion generated by heart beats between the pericardium and epicardium during vertebrate embryonic development was investigated and found to move important precursor cells that contribute to epicardium morphogenesis in zebrafish (Peralta et al., 2013).

Although an important structure for heart function in vertebrates, little is known about the function of the pericardium in tunicates. Since flows in the tunicate heart are viscous dominated, the fluid dynamics of transport are very different than the large hearts of most adult vertebrates but closer to those of embryonic vertebrate hearts. Anderson (1968) and Kalk (1970) posited that the pericardium likely plays an important

mechanical role in blood flow after observing that a damaged pericardium resulted distention of the myocardium and an interruption in contractions. Xavier-Neto et al. (2010) has suggested that distention of the contractile layer is a distinct problem for valveless tubular hearts in general. The pericardium could improve some of the mechanical issues surrounding valveless, tubular hearts by physically restricting distention of the tube.

To investigate the function of the pericardium in tunicates, computational modeling can be a valuable complement to experimental manipulation. Models can be used to eliminate confounding biological features of flow, *e.g.* chemical signaling, as well as decouple physical features of flow that may contribute differently to biological function. For example, Taber et al. (2007) used a computational fluid dynamics model to show that cardiac cushions helped to initiate the transition between peristaltic and pulsatile flow in tubular hearts. Miller (2011) and Santhanakrishnan and Miller (2009) used numerical simulations of fluid-structure interactions to quantify the flow and vortex formation in the early embryonic ventricle. Computational models are also being used to investigate the pumping mechanism by which valveless tubular hearts drive flow (Baird et al., 2014; Loumes et al., 2008; Avrahami and Gharib, 2008).

Mathematical models of pumping can be divided into those in which 1) the motion of the boundary is prescribed and the fluid is driven by that motion, and 2) the fully-coupled fluid-structure interaction problem of a pump that drives the flow and is also deformed by the flow is solved (Taber et al., 2007; Jung and Peskin, 2001; Lee et al., 2009; Loumes et al., 2008; Fritz et al., 2012; Lee et al., 2012; Avrahami and Gharib, 2008). The Immersed Boundary Method (IBM) provides a relatively easy way to solve the fully coupled fluid-structure interaction problem (Peskin, 2002) and has been used by several groups to simulate

flow in tubular hearts (Baird et al., 2014; Jung and Peskin, 2001; Lee et al., 2009; Jung et al., 2008; Lim and Jung, 2010). Despite its prominence as an anatomical structure, none of these numerical studies have included a rigid structure surrounding the contracting region of the tubular heart.

In this study, we investigate the role of the pericardium in producing fluid flow in the valveless, tubular heart of the solitary tunicate *Ciona savignyi* Herdman. We use two approaches: 1) Experimental manipulation: measurements of blood flow in the lumen and contraction kinematics were taken on animals with *in vivo* manipulations of the pericardium and otherwise intact circulatory systems, and 2) Computational modeling: IBM models were used to simulate flow through a racetrack circulatory system driven by a valveless, tubular contracting region with and without a rigid pericardium.

## Results

### Experimental manipulations on animals

Relaxed body lengths of tunicates ( $n = 16$  animals) varied from 25 to 55 mm. Neither myocardium diameter ( $F(1,15) = 2.62$ , corrected  $p = 1$ ) nor pericardium diameter ( $F(1,15) = 4.75$ , corrected  $p = 0.50$ ), a measurement that should not change with damage to the pericardium, had a significant relationship with body length. Pericardium-to-myocardium diameter ratio ( $PM$ ) ratio (see Materials and Methods for full definition) also did not have a significant relationship with body length ( $F(1,15) = 1.47$ , corrected  $p = 1$ ).

Experimental observations of the myocardium kinematics show that the myocardium becomes inflated within the pericardial space after the pericardium is damaged and pericardial fluid is allowed to leak out of the pericardial space. The average  $PM$  ratio dropped from  $2.4 \pm 0.09$  for undamaged condition to  $1.8 \pm 0.2$  for the damaged condition, and this decrease in  $PM$  ratio with increasing damage level is significant ( $F(1,15)$

= 80.1, corrected  $p = 2 \times 10^{-6}$ ). We observed that severe damage to the pericardium often resulted in kinks to the myocardium, occluding flow in the lumen during pumping.

After pericardium damage, it was more difficult for the myocardium to contract, but the rate at which the myocardium contracted did not change. The contraction ratio (diameter of myocardium during contract to diameter of relaxed myocardium) ranged from 0.135 (86% closure) to only 0.566 (43% closure) (Fig. 2C). This decrease is not significantly correlated with pericardium damage ( $F(1,14) = 9.58$ , corrected  $p=0.10$ ), but it was significantly correlated with *PM* ratio ( $F(1,14)=12.7$ , corrected  $p=0.034$ ). Heartbeat frequency does not change significantly with damage (Fig. 2A,  $F(1,14) = 0.112$ , corrected  $p = 1$ ) or *PM* ratio ( $F(1,14) = 0.2922$ , corrected  $p=1$ ). Actuation of heart beats is not affected by changes in myocardium diameter, but the ability of the myocardium to contract fully is affected.

Peak dye speed in the lumen was severely interrupted by damage to the pericardium (Figs. 3 and 2B and D). There is a proportional response to damage; there is a significant linear relationship between *PM* ratio and peak dye speed, shown in Fig. 2D ( $F(1,13) = 78.3$ ,  $p = 8 \times 10^{-6}$ ). Contraction ratio also negatively correlated with peak dye speed ( $F(1,9) = 5.27$ ,  $p = 0.002$ ).

Two outliers were identified and omitted, one in the peak dye speed measurement (damaged group, *PM* ratio = 1.63, peak dye speed =  $7.13 \text{ mm s}^{-1}$ ; Bonferroni  $p = 0.012$ ). We observed that during the dissection, the myocardium near the terminus of the heart (at the point of injection) was inadvertently damaged and allowed a large amount of blood to leak out. This apparently resulted in an increase in peak dye speed likely due to relief of pressure in the lumen rather than a result of active pumping. The other outlier omitted is one in the contraction ratio



measurement (damaged group,  $PM$  ratio = 1.96, contraction ratio = 0.31; Bonferroni  $p = 0.004$ ).

### Computational model

A numerical model of an elastic heart tube connected to a nearly rigid racetrack was constructed to study flow through the *Ciona* heart. The racetrack design was used for easy comparison to previous models of tubular heart pumping (Jung and Peskin, 2000; Hickerson et al., 2005; Baird et al., 2014; Avrahami and Gharib, 2008; Lee et al., 2012). The contracting section of the tube resists bending and stretching. The racetrack section was constructed by connecting two sections of straight tube (one of which represents the elastic heart) to curved sections. The resting diameter of the racetrack was constant throughout its length. Dimensions and elastic properties of the racetrack are given in Table 1. A diagram of the model set up is shown in Fig 4.

The contractions waves were driven by a simplified model of the heart electromechanics. The propagation of the action potentials along the heart tube were modeled using the FitzHugh Nagumo equations (FitzHugh, 1955; Nagumo et al., 1962). The FitzHugh Nagumo equations are commonly used to model problems in electrophysiology, and they were derived by reducing the Hodgkin Huxley equations to two variables. Assume that  $v(x,t)$  is the dimensionless electropotential that is a function of position along the tube,  $x$ , and time,  $t$ , such that  $v=0$  is the resting potential and  $v=1$  is the maximum electropotential. Also assume that  $w$  represents a dimensionless ‘blocking mechanism’ that represents the action of the potassium channels and the blocking of the sodium ion channels.  $w=0$  is the resting strength, and  $w=1$  is the maximum strength. The 1-D FitzHugh Nagumo equations may be written as,

$$\frac{\partial v}{\partial t} = v(v-a)(v-1) - w - I(x,t) + D\nabla_x^2 v \quad (1)$$

$$\frac{\partial w}{\partial t} = \varepsilon(v - \gamma w) \quad (2)$$

$$(3)$$

where  $D$  is diffusion coefficient of the electropotential,  $a$  is the threshold potential,  $\gamma$  is a resetting rate,  $\varepsilon$  is the strength of blocking, and  $I(x,t)$  is an applied current that represents the action of the pacemaker. The equation for the applied current is given as follows:

$$I(x,t) = \begin{cases} I_{max} & : 0.175 L_{tube} < x < 0.02 L_{tube}, \\ nT < t < n(T + dp) \\ 0 & : otherwise \end{cases} \quad (4)$$

where  $L_{tube}$  is the length of the heart tube,  $I_{max}$  is the amplitude of the applied current,  $n$  is an integer representing the pulse number,  $T$  is the period of the pulse, and  $dp$  is the duration of the applied current.

The next step is to connect the electrophysiology model with the generation of contraction force. We used a simple model to drive the motion of the 2D heart with 1D muscles. Linear springs with variable spring stiffness and zero resting lengths were used to connect the top and bottom of the tube. The resting lengths of these springs were given as functions of the local electropotential according to the following rule:

$$k_m = \begin{cases} k_{max} v^4 & : v \geq 0 \\ 0 & : v < 0 \end{cases} \quad (5)$$

where  $k_{max}$  is the maximum effective stiffness of the springs since  $0 < v < 1$ , and no force is applied by the muscle springs when  $v < 0$ .  $k_{max}$  was set to  $k_s/100$ . This is only a toy model of muscle activation and force generation, but it has the necessary effect of creating a contraction wave that follows the depolarization along the heart tube.

For each simulation time step, the fluid velocity and pressure profiles was recorded at the outflow end of the myocardium at points across the diameter of the rigid circulatory tube. Two flow speeds were

then calculated from the fluid velocity profiles: peak flow speed and mean flow speed. For each time step, the maximum speed recorded in each fluid velocity profile was recorded. Of these, the local maximums for each heart beat were chosen and then time-averaged to find the peak flow speed. The mean flow speeds were found by spatially averaging the speeds across the tube's diameter and then taking the time-averaged mean of those speeds.

From the pressure profiles, four values of pressure were calculated. Pressure across the diameter of the racetrack was averaged spatially and temporally to find average pressure. The maxima and minima of spatially averaged pressure versus time were selected for each compression wave to find the average maximum pressure and average minimum pressure, respectively. The difference between average minimum and maximum pressures were calculated for each time point in the simulation and then averaged to find the difference between average minimum and maximum pressure.

### **Simulation Results**

Using parameter values of  $Wo = 0.30$ ,  $EI = 2.3 \times 10^{-12} \text{ Nm}^2$ , and  $\text{Freq} = 0.554 \text{ Hz}$ , the pericardium simulation had a mean flow speed of  $0.612 \text{ mm s}^{-1}$  and a peak flow speed of  $3.6 \text{ mm s}^{-1}$ , while the no-pericardium simulation had a mean flow speed of  $0.302 \text{ mm s}^{-1}$  and a peak flow speed of  $4.2 \text{ mm s}^{-1}$ . The ratio of mean flow speed to peak flow speeds are 0.17 to 0.07 for pericardium and no pericardium cases, respectively. As with many of the simulations during parameter sweeps, the peak flow speeds of the no-pericardium simulation are higher than that of the pericardium simulation, but the mean flow speed values are twice as high for the pericardium simulation.

In addition to the higher mean flow speeds, the pericardium limits local distention of the myocardium during contraction, particularly at the

junction between the myocardium and the rigid circulatory racetrack (Fig. 5). This mechanical benefit is clear in Fig. 5E, where the pericardium and myocardium touch briefly, as compared to Fig. 5B where there is nothing to prevent the myocardium from bulging out. This results in higher mean flow speeds and greater travel of the fluid markers at the same time in each simulation.

Increasing heartbeat frequency increases both mean flow speeds but leads to slightly lower peak flow speeds (Fig. 6A). Simulations with a pericardium does slightly better than no pericardium for frequencies less than 3 Hz, this difference increases at frequencies above 3 Hz. Mean-to-Peak flow speed ratios are consistently better for pericardium case, difference increases with increasing frequency (Fig. 6B).

For comparison over several orders of magnitude of  $Wo$ , only the dynamic viscosity,  $\mu$  was varied. Simulations with a pericardium outperform simulations without a pericardium in terms of mean flow speeds for Womersley number ( $Wo$ , see Eqn. 14) less than 1 (Fig. 6C). This gap closes to zero for  $Wo \geq 1$ . Peak flow speeds are generally lower for simulations with a pericardium than without. Mean-to-peak speed ratios see the largest difference around the  $Wo$  of the animal, with the pericardium having ratios about 2 times higher than no pericardium simulations.

Within pericardium simulations, there seems to be no relationship between myocardium flexural stiffness ( $EI$ , see Materials and Methods for description) and mean flow speed. For simulations with no pericardium, mean flow speed decreases as the myocardium becomes more flexible while the peak flow speeds remain the same (Fig. 6E). As  $EI$  increases, the ratios for the two conditions converge (Fig. 6F), with the no-pericardium case exceeding the mean flow speed of the pericardium case at values of  $EI > 1 \times 10^{-10} \text{ Nm}^2$ . Mean-to-peak speed ratios for

pericardium simulations are consistently higher than simulations without a pericardium.

The pericardium generally reduces the maximum average pressures and the differences between maximum and minimum pressures within the circulatory system compared to simulations without a pericardium while not affecting the average pressure (Fig. 7). When  $Wo$  was varied, simulations with no pericardium where  $Wo > 0.2$  have higher maximum pressures, lower minimum pressures, resulting in the circulatory system experiencing higher pressure differences (Fig. 7B). Pressure exhibits a similar non-linear relationship as peak flow speed with  $PM$  ratio (Fig. 7A). When a section of pericardium at the inflow end of the contracting region was left open, pressure differences were greater than simulations with an intact pericardium but lower than simulations with no pericardium (Fig. 7A).

Simulations demonstrate that there is a non-linear relationship between pericardium-to-myocardium ( $PM$ ) diameter when the diameter of the pericardium was altered to change the ratio. Flow speeds (Fig 8A) as well as  $PM$  ratio and pressure (Fig. 7A). Both mean and peak flow speeds are lower for ratios  $< 2.4$ . Mean flow speed peaks at around  $PM = 2.4$ – $2.5$ , whereas peak flow speed is maximized around  $PM = 3.0$ – $3.5$ . Beyond  $PM=2.5$ , mean flow speed drops slightly to the  $PM = \infty$  case (no pericardium).

### Comparison of Experiments and Simulations

Since peak dye speed was measured in the animal manipulations, a direct comparison can be made between peak dye speeds from experiments and peak flow speeds from simulations. Fig. 8B shows a plot of peak dye speed measured from experiments (Fig. 2D) overlaid with peak flow speed from simulations at various pericardium-to-myocardium diameter ratios. The curves are very similar, showing a similar increase in

peak speeds with increasing values of  $PM$ . The extremes of the experiments have the most obvious differences with simulations (no damage and sever damage), but these difference amount to less than  $1 \text{ mm s}^{-1}$  and simulation values are within the standard deviations of each experimental condition.

It is important to note a potential limitation of the comparison between experiments and simulations. Pericardium damage in the animal results in a decrease in the  $PM$  ratio due to an increase in the diameter of the myocardium. The simulations were constructed to determine how the  $PM$  ratio affects net flow for a constant diameter tube. Despite the difference in the way the  $PM$  ratio is handled, there is still reasonable agreement between experiments and simulations.

## **Discussion**

### **Pericardium improves blood flow driven by the myocardium**

Tunicates possess a heart capable of driving blood through a resistive, semi-open circulatory system. The heart consists of a myocardium that pumps blood peristaltically and a stiff tissue layer called the pericardium which encases the myocardium. The function of the pericardium was unclear, although observations made by Anderson (1968) and Kalk (1970) indicate that pericardial damage disrupts fluid flow through the circulatory system.

Observations made on experimental manipulation on tunicate hearts *in vivo* and computational simulations support the idea that the pericardium plays an important role in the myocardium's ability to contract and drive fluid flow. Experimental damage to the pericardium results in much lower peak dye speeds (Fig. 2B and D), and computational simulations show that adding a pericardium increases peak flow speeds (Fig. 6) and lowers pressure differences (Fig. 7). The differences in fluid flow in simulations are large at the  $Wo$  and  $PM$  ratios

of the animals.

There is a negative correlation between contraction ratio and *PM* ratio (Fig. 2C), indicating that the myocardium unable to fully contract with damaged or absent pericardium. Experiments show that reduced contraction leads to lower dye speeds within heart. Simulations show that no pericardium (where aneurysms are most pronounced) results in lower net flows compared to simulations with a pericardium.

For both the experiments and simulations, there is a range for *PM* diameter ratio where blood flow is fastest. When the pericardium is too narrow compared to myocardium's diameter, both peak and mean speeds are reduced, pericardial wall interferes with the contraction of the myocardium (Fig. 8A). If the pericardial space is too wide, there is no benefit of pericardium and larger ratios approach the flow speeds of no pericardium simulations ( $PM = \infty$ ). Simulations point to the maximum mean flow speeds takes place at  $PM=2.4-2.6$ , which corresponds to the unmanipulated *PM* ratios measured on animals with intact circulatory systems (Fig. 8B).

The increase in *PM* ratio after pericardial damage is correlated with a decrease in the contraction ratio and drop in the blood flow produced by the heart (Fig. 2), and the computational simulations suggest that there is a physical explanation for this response. Heart beat frequency does not change with pericardium damage (Fig. 2A) or increased pressure within the heart tube. These observations circumstantially suggest heart activity is not controlled through a pressure-sensing within the myocardium alone.

### **Pericardium provides structural support for the myocardium**

Kalk (1970) notes that narrow vessels produce a 'considerable back pressure' which the heart needs to overcome in order to move fluid. Yet, few structural components in the myocardium itself can resist extreme

internal pressure, evidenced by the increase in myocardium diameter when the pericardium is damaged or removed. Since the pericardium is very stiff, it can resist the internal pressures generated by contraction of the myocardium by limiting the total volume of the myocardial lumen and pericardial space. Simulations results show that the addition of a pericardium reduces differences between maximum and minimum pressures (Fig. 7). Experimental results show that the myocardium closes the lumen less during contraction (Fig. 2C) as the diameter of the myocardium increases (reflected in *PM* ratio), which in turn lowers the peak speeds produced by the heart (Fig. 2D).

It appears as if the myocardium cannot produce enough force to close the lumen sufficiently against internal pressure without the pericardium's support, nor can it resist the increase in volume of the lumen as circulatory pressure forces more blood into the myocardium. Schulze (1964) notes that each cell (which has a 15:1 length to diameter ratio) has one myofibril aligned at a 45 degree angle with the length of the lumen, creating a helical spiral of myofibrils around the lumen (Kalk, 1970). When the myocardial diameter increases (due to damage to the pericardium), the fiber angle must also increase which increases both the diameter of the myocardium and the length of the myofibrils (Kier, 2012). Although the force-length relationship is not known for tunicate cardiac muscle, likely the stretching of myofibrils exacerbates the inability of the myocardium to close the lumen during contraction.

In addition to promoting closure of the lumen, the pericardium also acts to limit flow extremes produced by the flexible myocardium by physically disrupting the amount of vertical displacement of the myocardium during contraction. Simulations of blood flow with no pericardium showed that the myocardium bulges to create local distention, despite the relatively low-resistance posed by the racetrack



circulatory system (Fig. 5). These aneurysms are particularly severe at the point where the flexible heart tube meets the rigid circulatory vessel. The general effect of these aneurysms, marked by high peak flow speeds relative to the mean flow speed generated by pumping, more back flow, and higher pressure differences, is that energy expended contracting the myocardium is wasted by expanding the flexible myocardium vertically, instead of driving flow inside the circulatory system.

### **Implications for development of the vertebrate circulatory system**

Vertebrate hearts produce very high pressures to drive fluid flow through highly resistive tissues of the body. In order to produce these high pressures, the heart and vessels of the vertebrate circulatory system have an extensive network of connective tissue that resists both collapse under negative pressure and aneurysm under positive pressures. Weakening or failure of this support structure is often catastrophic (Vogel, 1994).

During evolutionary time, the primitive cardiac tube increased in size, beat frequency, and pressure-generating force to continue to move blood through an increasingly large and complex network of small vessels. By covering the myocardium in a stiff, outer layer, the mean blood speed produced by the tubular heart increased. The pericardium enhances mean blood flow under a variety of conditions that reflect increasing body size and metabolic rate. The pericardium addresses a major problem that the primitive cardiac tube faced by scaling during evolution by providing one mechanism to extend the performance space of the primitive cardiac tube without major reorganization of tissues.

Importantly, the pericardium in our simulations made the mean blood flow produced by the myocardium much less sensitive to the flexibility of the tube. This most likely benefited organisms both during

ontogeny and evolution as the material properties of vertebrate cardiac tissue changes with its level of organization; Young's modulus ( $E$ ) varies from 5 kPa for single cardiomyocytes to 200 kPa for an isolated cardiac muscle fiber (Mathur et al., 2001). Reducing sensitivity to tissue material properties would allow animals to use a wide variety of tissue organizations to maintain blood flow during growth and evolution.

## **Future work**

In this paper, we used a two-dimensional version of the immersed boundary method to perform numerical simulations of a pumping elastic heart tube surrounded by a stiff pericardium and compared the results to *in vivo* flows measured using dye visualization. Future work could incorporate measurements of the pressures within intact and damaged pericardia and heart tubes. It is also possible to obtain spatially resolved flow fields using micro-particle image velocimetry similar to what is described in Hove et al. (2003) and Vennemann et al. (2006). In terms of numerical simulations, an obvious next step is to move into three dimensions. In addition to resolving any 3D effects, this would allow that use of helically wound fibers to drive the motion of the heart tube. More detailed models of the electrophysiology and muscle mechanics could then be applied for the activation of muscle and generation of force. Finally more accurate models of the morphology of both the heart and the circulatory system could be used to better resolve the flow fields and intra-cardiac pressure gradients. For this first study, however, we believe that the experimental and modeling techniques are sufficient to highlight the important role of the pericardium for tiny heart tubes.

## **Methods and Materials**

### **Maintenance of animals**

Individuals of the tunicate species *Ciona savignyi* Herdman were shipped overnight from the Ciona Stock Center (UC Santa Barbara, CA, USA) in cooled containers and then maintained for two to four weeks in a recirculating, artificial seawater system at 20°C and salinity 32-34 ppt. Animals were fed commercially available live phytoplankton mixture (Phyto Feast Live, Reef Mariculture Inc, Campbell, CA, USA) every day during the maintenance period.

## Experimental manipulations

Animals were relaxed in groups of two or three individuals with menthol crystals in a covered dish of seawater prior to experiments until relaxed (approximately 120 minutes). Animals were considered completely relaxed if there was no reaction to the insertion of a sharp probe into a siphon. Individual animals were then removed from menthol-containing seawater to fresh seawater where the tunic was completely removed. Animals were then photographed with a standard cm ruler (which was used to measure relaxed body length using ImageJ (Rasband, 1997-2002)) pinned with their atrial (excurrent) siphon to the left side of the body so the right side of the animal's body was exposed. A small opening was then cut into the visceral mass to expose the heart without damaging the major vessels leading to it. The heart was left tucked into the visceral mass and the branchial membrane was left intact to avoid pinching or otherwise constricting flow within the major vessels.

For experimental manipulations of the heart, the following conditions were used: (1) without manipulation (undamaged) to the pericardium; (2) slight damage to the pericardium; and (3) severe damage to the pericardium. Damage to the pericardium was performed by clipping a small hole with scissors in a portion of the central pericardium at the proximal end of the myocardial loop (less than 0.5 mm<sup>2</sup> area) for slight damage, and clipping out a large section of pericardium (over 0.5 mm<sup>2</sup> area) for the severely damaged condition. In all treatments, the myocardium was left undamaged and still connected to the pericardium via the raphe; the intactness of the myocardium was verified by close inspection after damage was inflicted to the pericardium.

For quantitative measurements of blood speed through the myocardial lumen, a micro-liter volume syringe with a 36-gauge needle (NF36BV-2, OD: 110  $\mu$ m, World Precision Instruments, Sarasota FL,

USA) was inserted into the dorsal blood sinus. Fluorescein dye prepared in isotonic seawater (32 ppt) at 30 mg/L was injected into the lumen of the myocardium in a 5-7  $\mu$ L bolus when the direction of myocardial contractions put the point of injection just upstream from the heart. The field was illuminated by a blue light source to increase emission of the fluorescent dye. The dye traveled through the lumen of the heart with the contraction of the myocardium. The hole produced by the needle was small enough that it closed immediately after the needle was removed. This process was repeated for animals in all experimental conditions. Video was taken of myocardial contractions and a 0.5-mm ruler for scale with a Leica Fluorescence Stereo Microscope system (M205 FA, Leica Microsystems, Inc., Buffalo Grove, IL, USA) at varying frame rates with a green bandpass filter (GFP3, Leica Microsystems, Inc., Buffalo Grove, IL, USA).

Video taken during experiments were used to measure specific features of myocardium and relative dye concentration. For kinematic measurements of peak dye speed in the myocardium, the position of the leading edge of the initial dye bolus was digitized in Graphclick (Arizona Software, Inc.) by hand for every other frame during the duration of the first contraction after dye injection. Two consecutive positions were used to calculate displacement vector of the dye bolus between frames, and the time step between every other frame (based on the frame rate of the video) was used to calculate velocity. Peak speed was calculated by taking the magnitude of each velocity vector for each frame set, and the average of these speeds was calculated for all frame sets in the sample. This process was repeated three to five times for each animal, and the mean of these repetitions was used as mean peak dye speed for each animal.

To quantify the relative contraction of the myocardium during a heart beat, the inner edge of the myocardium was digitized by hand in Graphclick during a relaxed state and during a contracted state within the period of each heart beat. The contraction ratio was calculated by dividing the contracted measurement ( $M_c$ ) by the relaxed measurement ( $M_r$ ) (Fig. 1B). This was repeated three times per animal, and the ratios were averaged for each animal. Similarly, the length of the myocardium was measured in Graphclick by selecting points on the outer edge of the myocardial tube between both pacemaking regions of the heart.

The pericardium-to-myocardium ratio was calculated by measuring in Graphclick the width of the pericardium at the proximal-most end of the myocardial loop ( $PD$  in Fig. 1B) and dividing that with the diameter of the relaxed myocardium within the myocardial loop ( $M_r$  in Fig. 1B), close to the point at which the pericardium was measured. This measurement was repeated once for each animal.

To measure the heartbeat frequency, the videos were converted to grayscale image sequences (see Fig. 3 for two examples). Grayscale intensity is a measure for dye intensity, since the bandpass filter restricted light capture to wavelengths very close to the emission wavelength of fluorescein dye (520 nm) and the maximum concentration of dye within the lumen did not wash out the grayscale. Mean grayscale intensities (relative dye intensity) were measured in ImageJ over the area of the frame containing the heart loop for each video frame. Relative dye intensities were graphed in *R* (Team, 2011) against time and the peaks of dye intensity for each heartbeat were selected. The distance between each set of peaks was calculated, yielding the heartbeat period, and the frequency was calculated as one over the period. The frequencies for each set of peaks (5 to 12 heart beats) were average and average to find the

mean frequency for each animal.

### Statistical Analysis

Statistical analysis was performed with the standard statistics and *car* packages in *R* (Team, 2011; Fox and Weisberg, 2011). Two-way analysis of variance tests were used to test for significance between groups and trends and their ANOVA *F*-statistics and degrees of freedom (DoF) are reported. Additionally, linear regression analysis was performed in *R* between continuous variables; these are reported with slopes, *p*-values associated with slope, *y*-intercepts ( $y_0$ ), and adjusted  $R^2$  values. *P*-values were then corrected using a Bonferroni multiple-comparison correction; corrected *p*-values are reported alongside *F*-statistics and degrees of freedom. The data were tested for outliers with a Bonferroni test for outliers in linear models.

### Immersed Boundary Simulations

The IB method is an approach to fluid-structure interaction problems in which structures are immersed in a viscous incompressible fluid (Peskin, 2002). The IB formulation of these problems uses a Lagrangian description of the structural deformations and stresses of the immersed body and an Eulerian description of the fluid. Integral transforms with Dirac delta function kernels couple the Lagrangian and Eulerian frames. The equations are discretized, the singular delta function is replaced by a regularized version of the delta function.

The following outline describes the two-dimensional formulation of the immersed boundary method, but the three dimensional extension is straightforward. For a full review of the method, please see Peskin (2002). The equations of fluid motion are given by the Navier–Stokes equations:

$$\rho(\mathbf{u}_t(\mathbf{x}, t) + \mathbf{u}(\mathbf{x}, t) \cdot \nabla \mathbf{u}(\mathbf{x}, t)) = \nabla p(\mathbf{x}, t) + \mu \nabla^2 \mathbf{u}(\mathbf{x}, t) + \mathbf{F}(\mathbf{x}, t) \quad (6)$$

$$\nabla \cdot \mathbf{u}(\mathbf{x}, t) = 0 \quad (7)$$

where  $\mathbf{u}(\mathbf{x}, t)$  is the fluid velocity,  $p(\mathbf{x}, t)$  is the pressure,  $\mathbf{F}(\mathbf{x}, t)$  is the force per unit area applied to the fluid by the immersed boundary,  $\rho$  is the density of the fluid, and  $\mu$  is the dynamic viscosity of the fluid. The independent variables are the time  $t$  and the position  $\mathbf{x}$ .

The interaction equations between the fluid and the boundary are given by:

$$\mathbf{F}(\mathbf{x}, t) = \int \mathbf{f}(r, t) \delta(\mathbf{x} - \mathbf{X}(r, t)) dr \quad (8)$$

$$\mathbf{X}_t(r, t) = \mathbf{U}(\mathbf{X}(r, t)) = \int \mathbf{u}(\mathbf{x}, t) \delta(\mathbf{x} - \mathbf{X}(r, t)) d\mathbf{x} \quad (9)$$

where  $\mathbf{f}(r, t)$  is the force per unit length applied by the boundary to the fluid as a function of Lagrangian position and time,  $\delta(\mathbf{x})$  is a two-dimensional delta function,  $\mathbf{X}(r, t)$  gives the Cartesian coordinates at time  $t$  of the material point labeled by the Lagrangian parameter  $r$ . Eqn 8 applies force from the boundary to the fluid grid and adds an external force term, and Eqn 9 evaluates the local fluid velocity at the boundary. The boundary is then moved at the local fluid velocity, and this enforces the no-slip condition. The numerical parameters used for the simulations are given in Table 2. Unless otherwise noted, all simulations were performed on a  $512 \times 512$  grid. The specific discretization used in this paper is described in Peskin and McQueen (1996).

Force equations are given for tether forces to hold the boundary in place, spring forces to resist stretching, and bending forces to resist bending. In a simple case where the boundary is to be held in place, boundary points are tethered to target points. The equation describing the force applied to the fluid by the boundary in Lagrangian coordinates is given by:

$$\mathbf{f}_{targ}(r, t) = k_{targ} (\mathbf{Y}(r, t) - \mathbf{X}(r, t)) \quad (10)$$

where  $\mathbf{f}_{targ}(r, t)$  is the force per unit length,  $k_{targ}$  is a stiffness coefficient,



and  $\mathbf{Y}(r,t)$  is the prescribed position of the target boundary. The equations used to determine the forces due to the resistance to stretching,  $\mathbf{f}_{str}(r,t)$  and  $\mathbf{f}_{bend}(r,t)$  are given as:

$$\mathbf{f}_{str}(r,t) = -k_{str} \frac{\partial}{\partial r} \left( \left( \left| \frac{\partial \mathbf{X}}{\partial r} \right| - 1 \right) \frac{\partial \mathbf{X}(r,t)/\partial r}{\left| \partial \mathbf{X}(r,t)/\partial r \right|} \right) \quad (11)$$

and

$$\mathbf{f}_{bend}(r,t) = -EI \frac{\partial^4 \mathbf{X}(r,t)}{\partial^4 r}. \quad (12)$$

$k_{str}$  is a stiffness coefficient that is proportional to the resistance to stretching or compression and  $EI$  is the flexural stiffness. The total force is then the some of these three forces:

$$\mathbf{f}(r,t) = \mathbf{f}_{arg}(r,t) + \mathbf{f}_{str}(r,t) + \mathbf{f}_{beam}(r,t). \quad (13)$$

Womersley number was calculated using the average frequency of the undamaged heart ( $\omega = 0.554 \text{ s}^{-1}$ ), the diameter of the myocardium of the undamaged heart ( $M_r = 0.8682 \text{ mm}$ ), and the kinematic viscosity of seawater ( $\mu/\rho = 5.8 \times 10^{-5} \text{ m}^2 \text{ s}^{-1}$ ) using the equation,

$$Wo = M_r \sqrt{\frac{\omega \rho}{\mu}}. \quad (13)$$

$Wo = 0.3$  for simulations other than  $Wo$  sweeps. For the study where we varied the  $Wo$  over several orders of magnitude, the  $Wo$  was changed using only the dynamic viscosity.

Flexural stiffness for simulations other than  $EI$  sweeps ( $EI = 2.3 \times 10^{-12} \text{ Nm}^2$ ) was chosen based on the second moment of area ( $I$ ) for a flat plate (Wainwright et al., 1982) and Young's modulus ( $E$ ) for single vertebrate cardiocyte (5 kPa) based on measurements by Mathur et al. (2001). Since all boundaries in the simulation are assumed to be infinitely thin, the flexural stiffness was simply varied by changing the value of  $EI$  in equation 12.

## Acknowledgements

E. Newman-Smith and the Ciona Stock Center at Univ. of California, Santa Barbara for animals; J. Liu, M. Ortwine, and the Zebrafish Core Facility at UNC-CH for assistance with equipment; A. Baird, H. Edwards, and M. Williams for assistance with computational simulations; and two anonymous reviewers for their helpful and constructive feedback.

## Funding

NSF DMS CAREER # 1151478 (to L. Miller) and by a NSF DMS Research and Training Grant # 5-54990-2311 (to R. McLaughlin, R. Camassa, L. Miller, G. Forest, and P. Mucha).

## Abbreviations

$PM$  — Pericardium-to-myocardium ratio

$M_r$  — Diameter of relaxed myocardium

$M_c$  — Diameter of contracted myocardium

$PD$  — Diameter of pericardium

$v$  — Dimensionless electropotential

$x$  — Position along heart tube

$t$  — Time

$w$  — Dimensionless blocking potential

$D$  — Diffusion coefficient of electropotential

$a$  — Threshold potential

$\gamma$  — Resetting rate

$\eta$  — Strength of blocking

$I$  — Applied current by pacemaker

$L_{tube}$  — Length of heart tube

$I_{max}$  — Amplitude of applied current

$T$  — Period of pulse

$dp$  — Duration of applied current

$k_m$  — Resting length of springs

$k_{max}$  — Maximum effective stiffness of springs

$k_s$  — Spring stiffness

$Wo$  — Womersley number

$EI$  — Flexural stiffness of myocardium

$E$  — Young's modulus

$\omega$  — Heartbeat frequency

$OD$  — Outer diameter

$\mathbf{u}$  — Fluid velocity

$p$  — Fluid pressure

$\mu$  — Fluid dynamic viscosity

$\rho$  — Fluid density

$\mathbf{x}$  — Position in fluid grid

$\mathbf{f}$  — Force per unit length

$\delta(\mathbf{x})$  — Two-dimensional Dirac delta function

$r$  — Lagrangian position parameter

$I$  — Second moment of area

$\mathbf{f}_{targ}$  — Force per unit length

$\mathbf{f}_{str}(r,t)$  and  $\mathbf{f}_{bend}(r,t)$  — Forces due to resistance to stretching and

bending

$k_{targ}$  — Stiffness coefficient

$\mathbf{Y}(r,t)$  — prescribed position of target boundary

$y_0$  — y-intercept of linear regression

$R^2$  — Correlation coefficient of linear regression

## References

- Anderson, M.** (1968). Electrophysiological studies on initiation and reversal of the heart beat in *Ciona intestinalis*. *J. Exp. Biol.* **49**, 363–385.
- Avrahami, I. and Gharib, M.** (2008). Computational studies of resonance wave pumping in compliant tubes. *Journal of Fluid Mechanics* **608**, 139–160.
- Baird, A., King, T. and Miller, L.** (2014). Numerical study of scaling effects in peristalsis and dynamic suction pumping. *Proceedings of the American Mathematical Society* **in press**.
- Bone, Q. and Whitear, M.** (1958). A note on the innervation of the pericardium in *Ciona*. *Pubbl Stn Zool Napoli* **30**, 337–341.
- Burighel, P., Sorrentino, M., Zaniolo, G., Thorndyke, M. and Manni, L.** (2001). The peripheral nervous system of an ascidian, *Botryllus schlosseri*, as revealed by cholinesterase activity. *Invert Biol* **120**, 185–198.
- Davidson, B.** (2007). *Ciona intestinalis* as a model for cardiac development. *Semin. Cell Dev. Biol.* **18**, 16–26.
- Delsuc, F., Brinkmann, D., Chourrout, D. and Philippe, H.** (2006). Tunicates and not cephalochordates are the closest living relatives of vertebrates. *Nature* **439**, 965–968.
- Dooley, K. and Zon, L.** (2000). Zebrafish: a model system for the study of human disease. *Current Opinion in Genetics and Development* **10**, 252–256.
- Farrell, A., Johansen, J. and Graham, M.** (1988). The role of the pericardium in cardiac performance of the trout (*Salmo gairdneri*). *Physiological Zoology* **61**, 213–221.
- FitzHugh, R.** (1955). Mathematical models of threshold phenomena in the nerve membrane. *Bull Math Biophysics* **17**, 257–278.

**Fox, J. and Weisberg, S.** (2011). *An R Companion to Applied Regression*. Thousand Oaks, CA, USA: Sage, 2nd edition.

**Fritz, T., Wieners, C., Seemann, G., Steen, H. and Dossel, O.** (2012). Simulation of the contraction of the ventricles in a human heart model including atria and pericardium. *Biomech. Model Mechanobiol.* DOI: **10.1007/s10237-013-0523-y**.

**Gashev, A.** (2002). Physiologic aspects of lymphatic contractile function. *Annals of the New York Academy of Sciences* **979**, 178–187.

**Greenlee, K., Socha, J., Eubanks, H., Thapa, G., Pederson, P., Lee, W. and Kirkton, S.** (2013). Hypoxia-induced compression in the tracheal system of the tobacco hornworm caterpillar, *Manduca sexta* L. *J. Exp. Biol.* **216**, 2293–2301.

**Harrison, J., Waters, J., Cease, A., Cease, A., VandenBrooks, J., Callier, V., Klok, C., Shaffer, K. and Socha, J.** (2013). How locusts breathe. *Physiology* **28**, 18–27.

**Heron, A.** (1975). Advantages of heartbeat reversal in pelagic tunicates. *J. Mar. Biol. Assoc. U.K.* **55**, 959–663.

**Hickerson, A. I., Rinderknecht, D. and Gharib, M.** (2005). Experimental study of the behavior of a valveless impedance pump. *Experiments in Fluids* **38**, 534–540.

**Hove, J. R., Koster, R. W., Forouhar, A. S., Acevedo-Bolton, G., Fraser, S. E. and Gharib, M.** (2003). Intracardiac fluid forces are an essential epigenetic factor for embryonic cardiogenesis. *Nature* **421**, 172–177.

**Jung, E., Lee, S. and Lee, W.** (2008). Computational models of valveless pumping using the immersed boundary method. *Computer Methods in Applied Mechanics and Engineering* **197**, 2329–2339.

**Jung, E. and Peskin, C.** (2001). Two-dimensional simulations of valveless pumping using the immersed boundary method. *SIAM J. Sci.*

*Comput.* **23**, 19–45.

**Jung, E. and Peskin, C. S.** (2000). Two-dimensional simulations of valveless pumping using the immersed boundary method two-dimensional simulations of valveless pumping using the immersed boundary method. *SIAM J. Sci. Comput.* **23**, 19–45.

**Kalk, M.** (1970). The organization of a tunicate heart. *Tissue and Cell* **2**, 99–118.

**Kier, W.** (2012). The diversity of hydrostatic skeletons. *J. Exp. Biol.* **215**, 1247–1257.

**Krenn, H.** (2010). Feeding mechanisms of adult Lepidoptera: structure, function, and evolution of the mouthparts. *Annu. Rev. Entomol.* **55**, 307–327.

**Lee, W., Jung, E. and Lee, S.** (2009). Simulations of valveless pumping in an open elastic tube. *SIAM J. Sci. Comput.* **31**, 1901–1925.

**Lee, W., Lim, S. and Jung, E.** (2012). Dynamical motion driven by periodic forcing on an open elastic tube in fluid. *Commun. Comput. Phys.* **12**, 494–514.

**Lemaire, P.** (2011). Evolutionary crossroads in developmental biology: The tunicates. *Development* **138**, 2143–2152.

**Lim, S. and Jung, E.** (2010). A three-dimensional model of a closed valveless pump system immersed in a viscous flow. *SIAM J. Appl. Math.* **70**, 1999–2010.

**Loumes, L., Avrahami, I. and Gharib, M.** (2008). Resonant pumping in a multilayer impedance pump. *Physics of Fluids* **20**, doi: 10.1063/1.2856528.

**Manner, J., Wessel, A. and Yelbuz, T.** (2010). How does the tubular embryonic heart work? looking for the physical mechanism generating unidirectional blood flow in the valveless embryonic heart tube. *Developmental Dynamics* **239**, 1035–1046.

**Mathur, A., Collinsworth, A., Reichert, W., Kraus, W. and Truskey, G.** (2001). Endothelial, cardiac muscle and skeletal muscle exhibit different viscous and elastic properties as determined by atomic force microscopy. *J. of Biomechanics* **34**, 1545–1553.

**McGrath, K. E., Koniski, A. D., Malik, J. and Palis, J.** (2003). Circulation is established in a stepwise pattern in the mammalian embryo. *Blood* **101**, 1669–1676.

**McMahon, B.** (2012). *Ontogeny and Phylogeny of the Vertebrate Heart.*, chapter Comparative evolution and design in non-vertebrate cardiovascular systems., pp. 1–33. New York: Springer.

**McMahon, B., Wilkens, J. and Smith, P.** (2011). Invertebrate circulatory systems. *Comprehensive Physiology Supplemental* **30**, 931–1008.

**Miller, L. A.** (2011). Fluid dynamics of ventricular filling in the embryonic heart. *Cell biochemistry and biophysics* **61**, 33–45.

**Moorman, A. and Christoffels, V.** (2003). Cardiac chamber formation: development, genes, and evolution. *APS Physiological Reviews* **83**, 1223–1267.

**Nagumo, J., Arimoto, S. and Yoshizawa, S.** (1962). An active pulse transmission line simulating nerve axon. *Proc IRE* **50**, 2061–2070.

**Nunzi, M., Burighel, P. and Schiaffino, S.** (1979). Muscle cell differentiation in the ascidian heart. *Developmental Biology* **68**, 371–380.

**Peralta, M., Steed, E., Harlepp, S., Gonzalez-Rosa, J., Monduc, F., Ariza-Cosano, A., Cortes, A., Rayon, T., Gomez-Skarmeta, J., Zapata, A., Vermot, J. and Mercader, N.** (2013). Heartbeat-driven pericardiac fluid forces contribute to epicardium morphogenesis. *Current Biology* **23**, 1726–1735.

**Peshkovsky, C., Totong, R. and Yelon, D.** (2011). Dependence of cardiac trabeculation on neuregulin signaling and blood flow in zebrafish.

*Developmental Dynamics* **240**, 446–456.

**Peskin, C.** (2002). The immersed boundary method. *Acta Numerica* **11**, 479–517.

**Peskin, C. S. and McQueen, D. M.** (1996). Fluid dynamics of the heart and its valves. In *Case Studies in Mathematical Modeling: Ecology, Physiology, and Cell Biology* (eds. H. G. Othmer, F. R. Adler, M. A. Lewis and J. C. Dallon), chapter 14, pp. 309–337. Prentice-Hall.

**Rasband, W.** (1997-2002). *ImageJ*. U.S. National Institutes of Health, Bethesda, MD, USA.

**Rupert, E. and Carle, K.** (1983). Morphology of metazoan circulatory systems. *Zoomorphology* **103**, 193–208.

**Rychter, Z., Kopecky, M. and Lemez, L.** (1955). A micromethod for determination of the circulating blood volume in chick embryos. *Nature* **175**, 1126–1127.

**Santhanakrishnan, A. and Miller, L.** (2011). Fluid dynamics of heart development. *Cell Biochem. Biophys.* **61**, 1–22.

**Santhanakrishnan, A. and Miller, L. A.** (2009). Flow within models of the vertebrate embryonic heart. *J Theor Biol* **259**, 449–461.

**Schulze, W.** (1964). Zur ultrastruktur des herzschlauchs von *Ciona intestinalis*. *L. Experientia* **20**, 265.

**Shabetai, R., Mangiardi, L., Bhargava, V., Jr., J. R. and Higgs, C.** (1979). The pericardium and cardiac function. *Prog. in Cardiovascular Diseases* **22**, 107–134.

**Simoes-Costa, M., Vasconcelos, M., Sampaio, A., Cravo, R., Linhares, V., Hochgreb, T., Yan, C., Davidson, B. and Xavier-Neto, J.** (2005). The evolutionary origin of cardiac chambers. *Developmental Biology* **277**, 1–15.

**Sudak, F.** (1965a). Intrapericardial and intracardiac pressures and the events of the cardiac cycle in *mustelus canis* (dogfish). *Comparative*



*Biochemistry and Physiology* **15**, 689–705.

**Sudak, F.** (1965b). Some factors contributing to the development of subatmospheric pressure in the heart chambers and pericardial cavity of *mustelus canis* (dogfish). *Comparative Biochemistry and Physiology* **15**, 199–215.

**Taber, L., Zhang, J. and Perucchio, R.** (2007). Computational model for the transition from peristalsis to pulsatile flow in the embryonic heart tube. *J. Biomech. Eng.* **129**, 441–449.

**Team, R. D. C.** (2011). *R: A Language and Environment for Statistical Computing*. R Foundation for Statistical Computing, Vienna, Austria, <http://www.r-project.org/> edition.

**Vennemann, P., Kiger, K. T., Lindken, R., Groenendijk, B. C. W., de Vos, S. S. and ten Hagen et al., T. L. M.** (2006). In vivo micro particle image velocimetry measurements of blood-plasma in the embryonic avian heart. *Journal of Biomechanics* **39**, 1191–1200.

**Vogel, S.** (1994). *Life in Moving Fluids: The Physical Biology of Flow*. Princeton, NJ: Princeton University Press.

**Wainwright, S., Biggs, W., Currey, J. and Gosline, J.** (1982). *Mechanical Design in Organisms*. Princeton, NJ: Princeton University Press.

**Xavier-Neto, J., Castro, R., Sampaio, A., Azambuja, A., Castillo, H., Cravo, R. and Simoes-Costa, M.** (2007). Parallel avenues in the evolution of hearts and pumping organs. *Cell. Mol. Life Sci.* **64**, 719–734.

**Xavier-Neto, J., Davidson, B., Simoes-Costa, M., Castillo, H., Sampaio, A. and Azambuja, A.** (2010). Evolutionary origins of the heart. In *Heart Development and Regeneration* (eds. N. Rosenthal and R. Harvey), volume 1, pp. 3–38. London: Elsevier Science and Technology, 1 edition.

## Figures

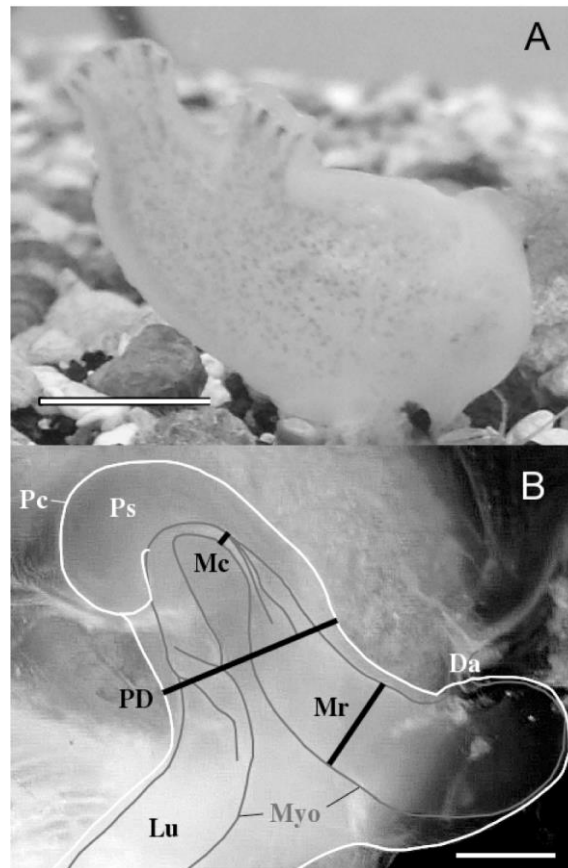

Figure 1: A: Adult tunicate *Ciona savignyi* Herdman, scale = 1 cm. B: Diagram of the heart morphology of *C. savignyi*, scale = 1 mm. Morphology: Pc - outline of pericardium (white), Myo - outline myocardium (gray), Lu - heart lumen, Da - dorsal blood sinus. Measurements: PD - Pericardium diameter, Mc - contracted myocardium diameter, Mr - relaxed myocardium diameter.

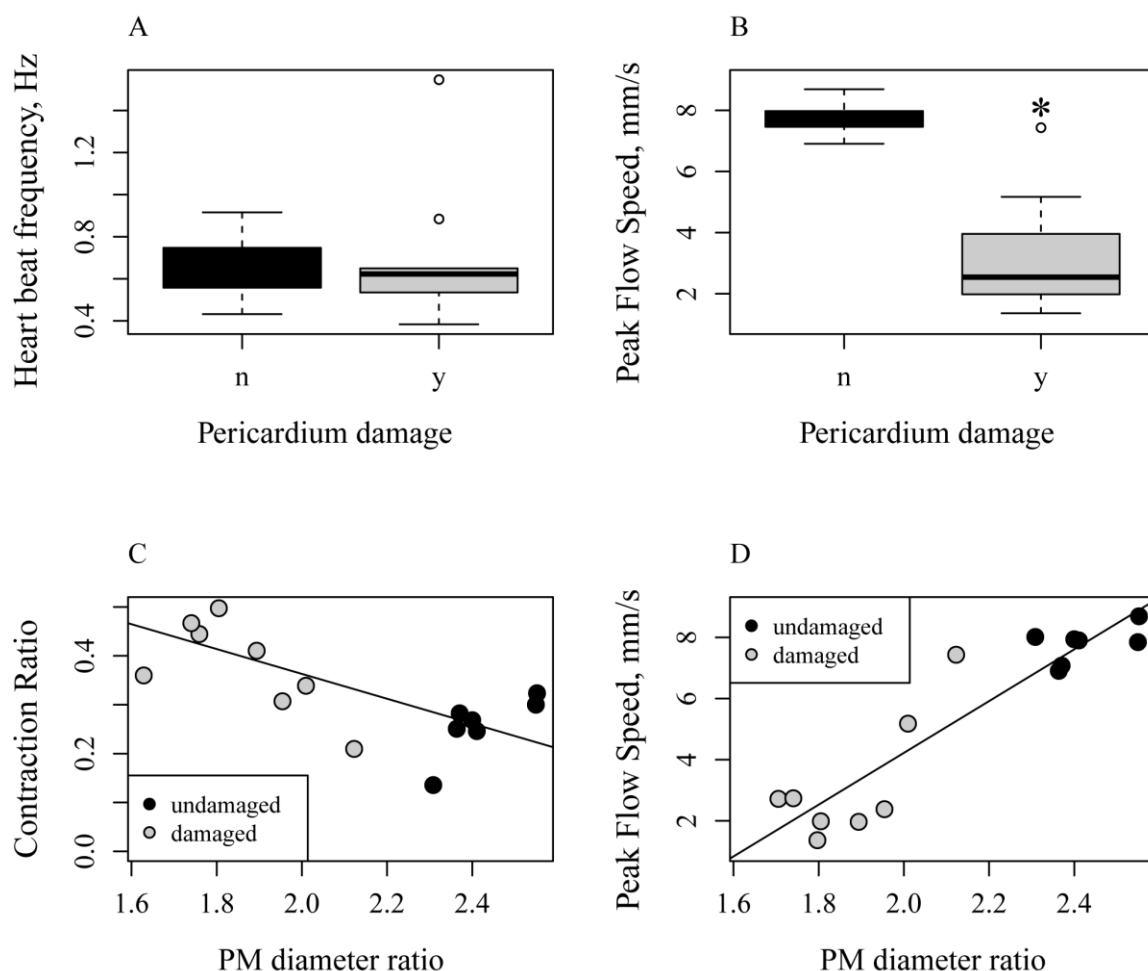

Figure 2: A. Box plot of heart beat frequency (Hz) versus pericardium damage: control/undamaged (black) and damaged (dark gray) conditions. B. Box plots of peak dye speed ( $\text{mm s}^{-1}$ ) of the leading edge of a dye bolus versus pericardium damage. Significance: “\*” for  $\alpha = 0.05$ . C. Contraction ratio versus pericardium-to-myocardium (*PM*) diameter ratio, colored by condition. Linear regression: (slope =  $-0.25$ ,  $p = 0.002$ ,  $y_0 = 0.87$ , adjusted  $R^2 = 0.48$ ). D. Peak dye speed versus *PM* diameter ratio, colored by condition. Linear regression: (slope =  $8.5$ ,  $p = 7 \times 10^{-7}$ ,  $y_0 = -12.7$ , adjusted  $R^2 = 0.85$ ).

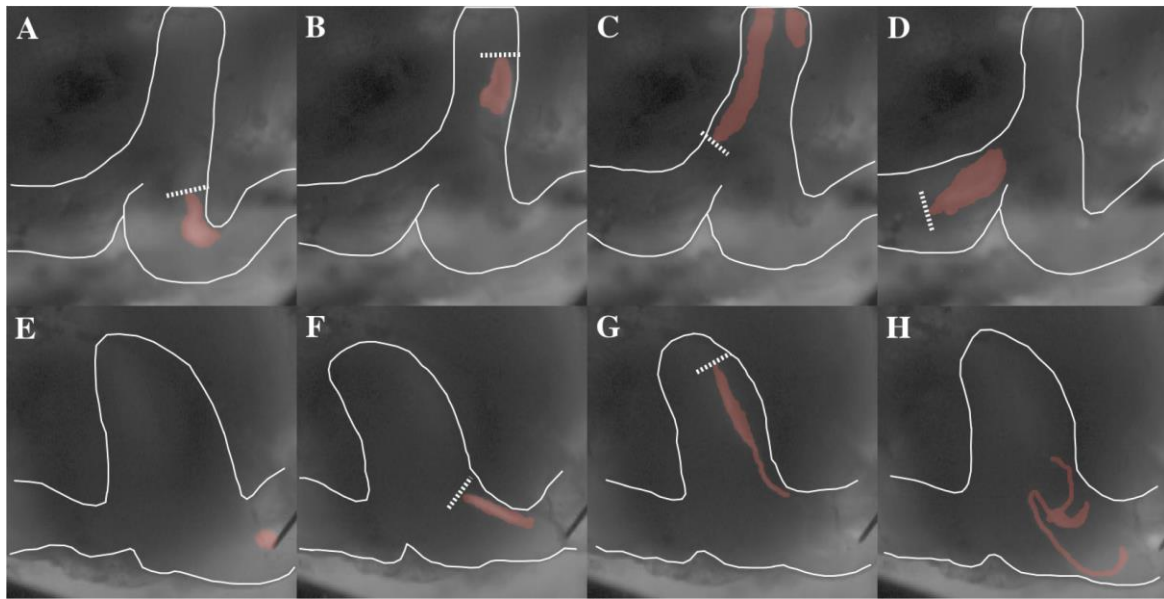

Figure 3: Panel images showing dye passing through heart after injection. A-D: Undamaged pericardium at A: 0 s, B: 0.7 s, C: 1.3 s, and D: 2.1 s after dye injection showing a dye bolus (light red) passing through the lumen. E-H: Severely damaged pericardium at E: 0 s, F: 0.7 s, G: 1.6 s, and H: 2.6 s after dye injection showing dye (light red) appearing and staying in heart after injection. In each panel, the edge of the pericardium is traced with a white line. Dotted lines show leading edge of dye boli.

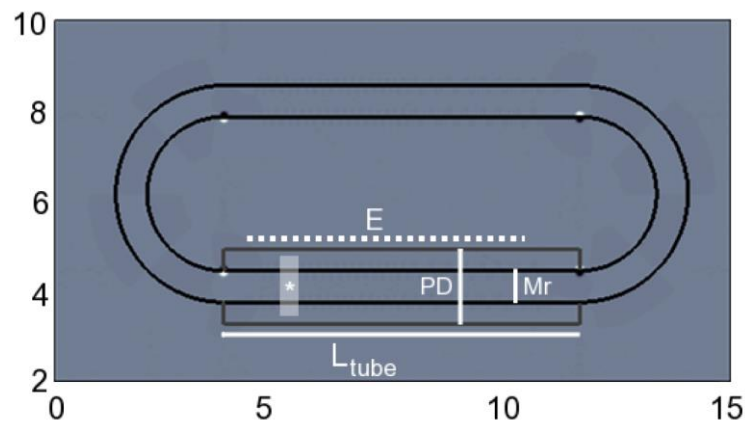

Figure 4: Diagram of the computational set up for the racetrack model.  $M_r$  is the diameter of the contracting myocardium,  $PD$  is the diameter of the pericardium,  $L_{tube}$  shows the length of the heart (both the contracting myocardium and pericardium), the dashed line marked E shows the portion of the contracting tube that is excitable, and the transparent white area marked with an asterisk (\*) identifies the pacemaker area where contractions originate.

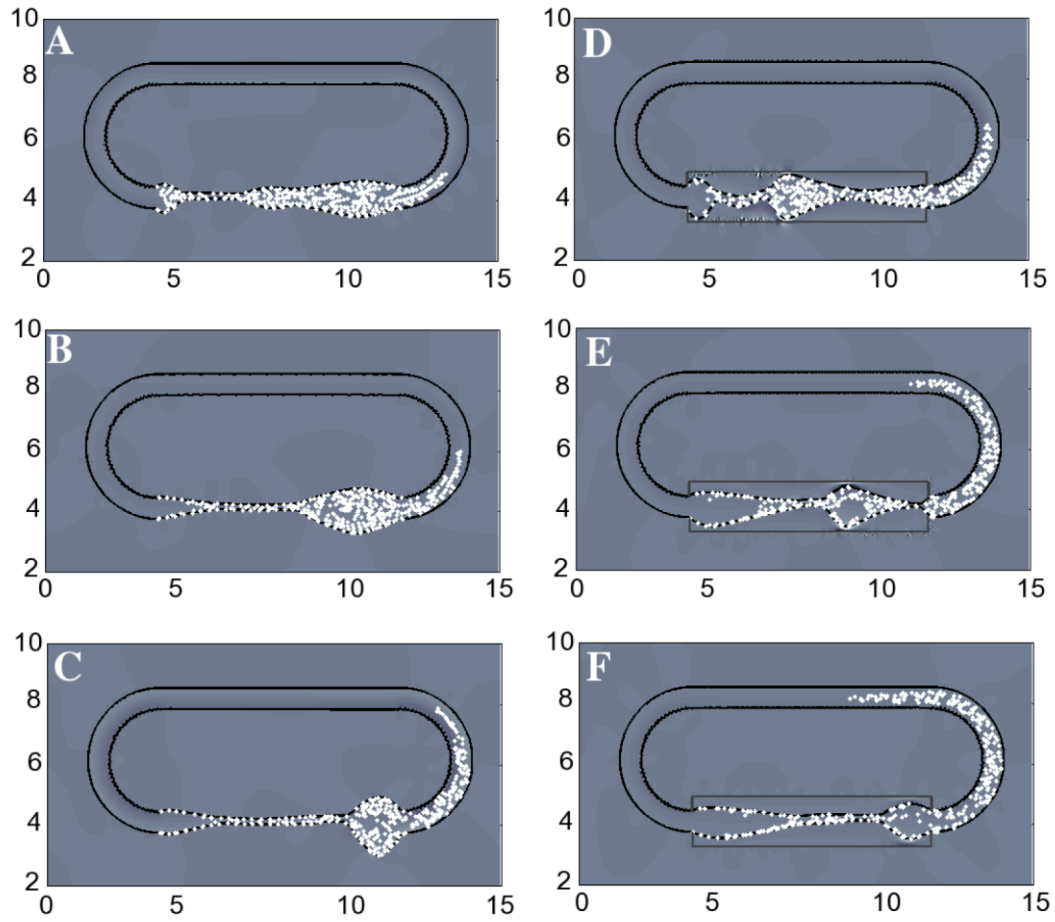

Figure 5: Images from simulations without (A-C) and with (D-F) a pericardium (in grey) at time steps: 2.3 s (A,B), 4.5 s (B,E), and 6.8 s (C,F). White marker particles indicate fluid packet positions along the racetrack. Background shading is vorticity. Axes labels are in mm.

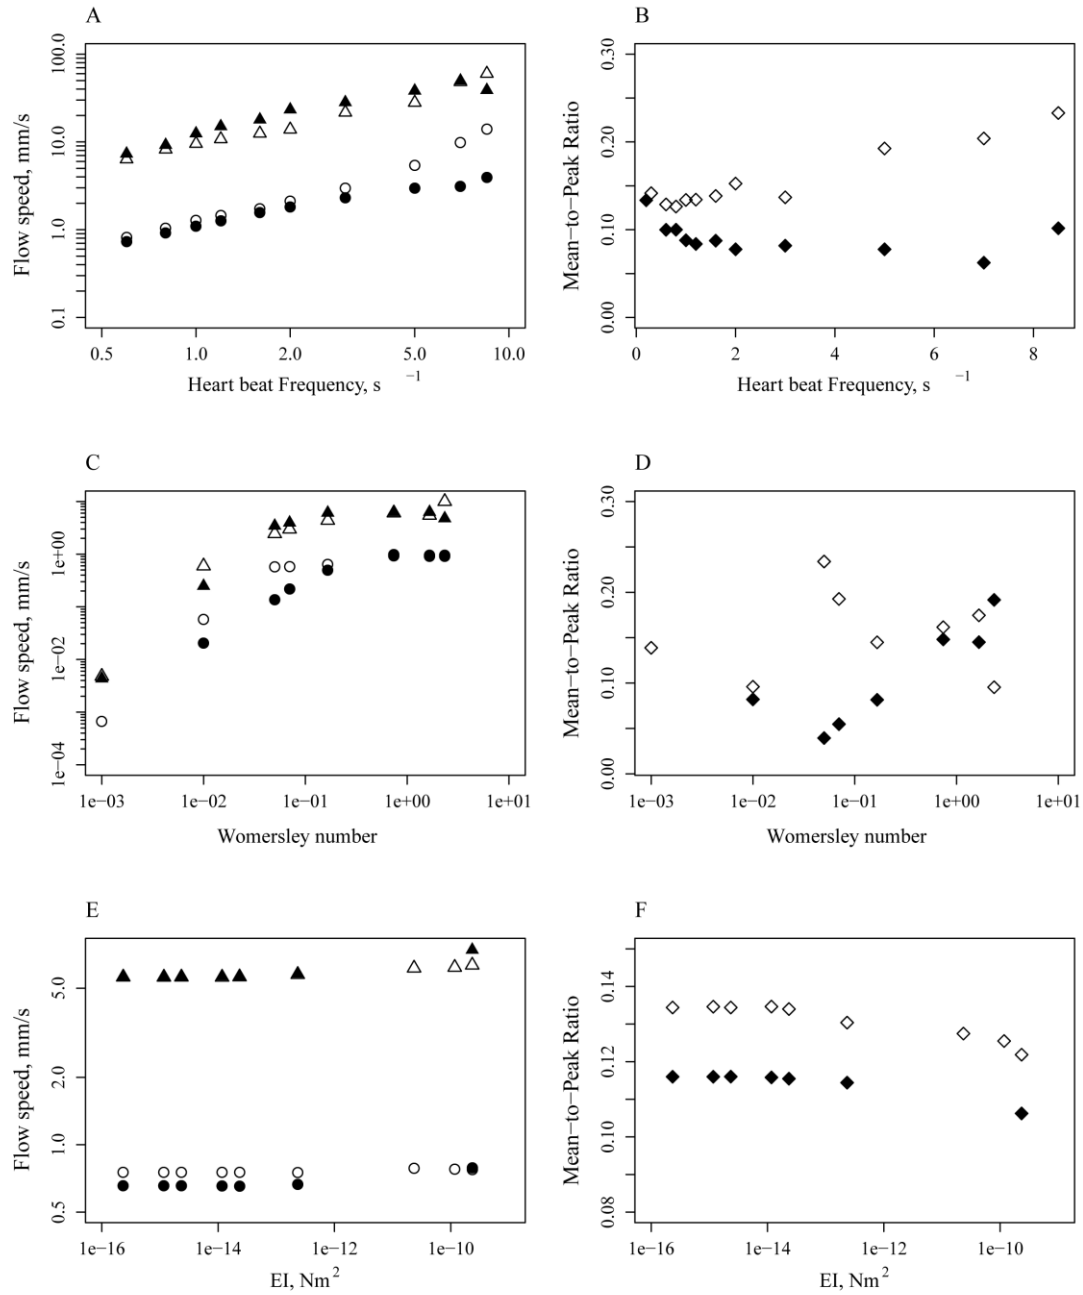

Figure 6: A,C,E: Mean (circles) and Peak (triangles) flow speed in mm s<sup>-1</sup> against parameter. B,D,F: Mean flow speed to peak flow speed ratio versus parameter. A-B: Heartbeat frequency in s<sup>-1</sup>; C-D: Womersley number; E-F: EI. White fill indicate the pericardium is present and black fill indicates no pericardium is present.

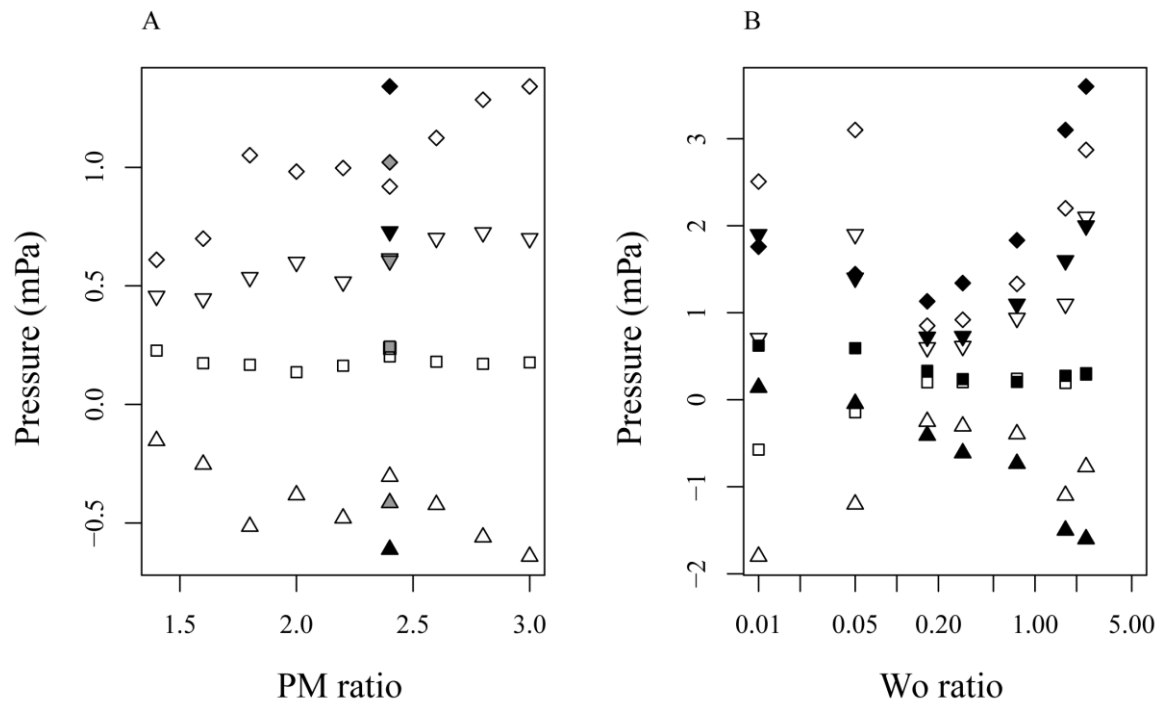

Figure 7: Pressures (in mPa) from racetrack simulations: average pressure (squares), average maximum pressure (inverted triangles), average minimum pressure (triangles), and average maximum pressure difference (diamonds). A. Pressure versus pericardium-to-myocardium diameter ratio for simulations with a pericardium (open markers). Pressures from simulations with a hole in the pericardium (gray markers) and no pericardium (black markers) are included at  $PM=2.4$ . B. Pressures versus Womersley number for simulations run with a pericardium (open markers) and with no pericardium (black markers).



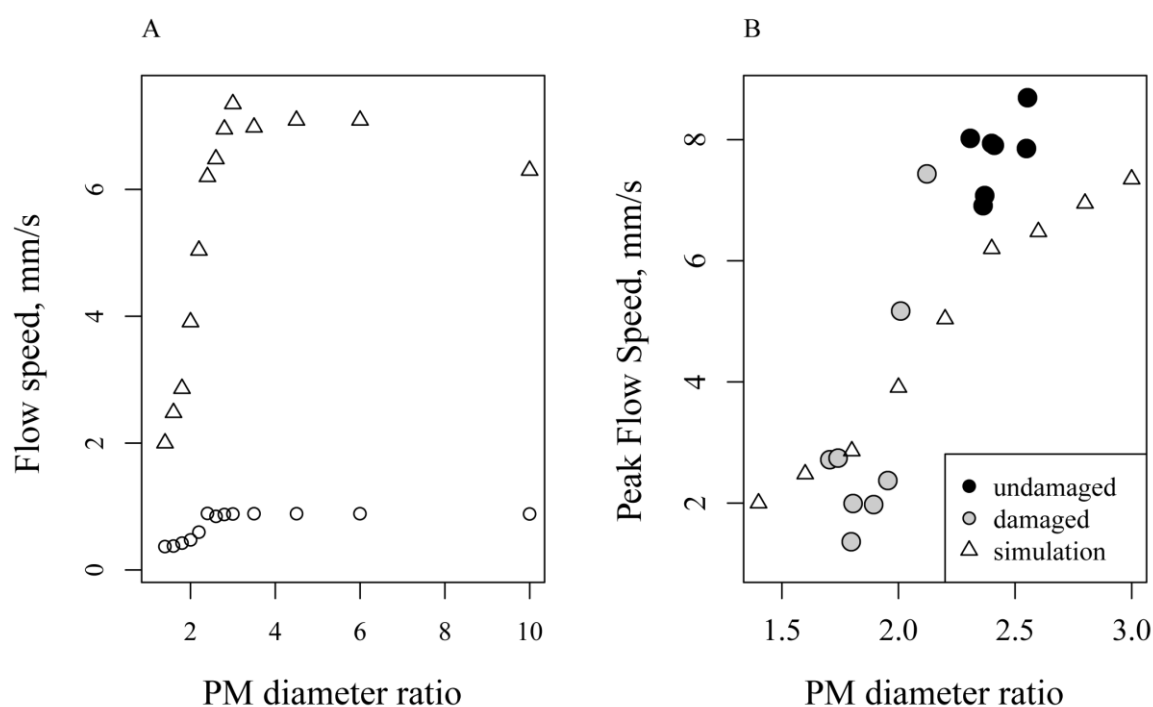

Figure 8: A. Mean (circles) and peak (triangles) flow speed in  $\text{mm s}^{-1}$  versus pericardium- to-myocardium diameter ratio. B. Comparison of peak dye speed values from experimental manipulations (Fig. 2D) and peak flow speed values from simulations varying pericardium- to-myocardium diameter ratio.

## Tables

Table 1: Table of physical and electromechanical parameters for the heart tube model. Note that all of the parameters for the electrophysiology model are dimensionless. Space is scaled by the length of the active contraction region and time is scaled by the pumping period.

| <i>Parameter</i>                       | <i>Abbreviation</i> | <i>Units</i>          | <i>Value</i>           |
|----------------------------------------|---------------------|-----------------------|------------------------|
| Elastic section                        | $L_{tube}$          | meters                | $7.91 \times 10^{-3}$  |
| Diameter                               | $d$                 | meters                | $6.957 \times 10^{-4}$ |
| Radius bend                            | $R_1$               | meters                | $2.4 \times 10^{-3}$   |
| Contraction frequency                  | $f_{beat}$          | seconds <sup>-1</sup> | 0.5554                 |
| Density                                | $\rho$              | kg/m <sup>3</sup>     | 1025                   |
| Dynamic viscosity                      | $\mu$               | Ns/m <sup>2</sup>     | $1.002 \times 10^{-3}$ |
| Flexural stiffness                     | $EI$                | Nm <sup>2</sup>       | $2.3 \times 10^{-12}$  |
| Stretching stiffness                   | $k_s$               | Nm <sup>-1</sup>      | $4.12 \times 10^8$     |
| Diffusion coefficient electropotenital | $D$                 | -                     | 0.023                  |
| Threshold potential                    | $a$                 | -                     | 0.3                    |
| Resetting rate                         | $\gamma$            | -                     | 0.5                    |
| Blocking strength                      | $\varepsilon$       | -                     | 0.01                   |
| Maximum applied current                | $I_{max}$           | -                     | 0.75                   |
| Period between start of pulses         | $T$                 | -                     | 1                      |
| Duration of pulse                      | $dp$                | -                     | 0.005                  |

Table 2: Table of numerical parameters for the heart tube model.

| Parameter       | Abbreviation | Units   | Value                 |
|-----------------|--------------|---------|-----------------------|
| Spatial step    | $dx$         | meters  | $2.93 \times 10^{-5}$ |
| Boundary step   | $ds$         | meters  | $1.47 \times 10^{-5}$ |
| Temporal step   | $dt$         | seconds | $1.36 \times 10^{-5}$ |
| Physical domain | $L$          | meters  | $1.5 \times 10^{-2}$  |
